# Supplementary material for: Impacts of inorganic draw solutes on the performance of thin-film composite forward osmosis membrane in a microfiltration assisted anaerobic osmotic membrane bioreactor
Source: Royal Society of Chemistry journal article supplement (doi:10.1039/c7ra01524k), 2017-01-01
Supplement: c7ra01524k1.pdf [file c7ra01524k1.pdf]

## Cover Page for Supporting Information

Manuscript title:

Impacts of inorganic draw solutes on the performance of thin-film composite forward osmosis membrane in a microfiltration assisted anaerobic osmotic membrane bioreactor

### Author list:

Taozhan Hu, Xinhua Wang\*, Chen Wang, Xiufen Li\*, Yueping Ren

Jiangsu Key Laboratory of Anaerobic Biotechnology, School of Environmental and Civil Engineering, Jiangnan University, Wuxi 214122, P.R. China

### Total number of pages (including the cover page):

7 pages

### List of Figures:

- Page 3**      **Fig. S1. Variations of water flux of MF membrane in both AnMF-OMBRs.**
- Page 4**      **Fig. S2. Variations of TOC concentrations in the influent, sludge supernatant, MF and FO permeates in NaCl-reactor (a) and MgCl<sub>2</sub>-reactor (b).**
- Page 5**      **Fig. S3. Variations of TP concentrations in the influent, sludge supernatant, MF and FO permeates in NaCl-reactor (a) and MgCl<sub>2</sub>-reactor (b).**
- Page 6**      **Fig. S4. EDX images of new and fouled FO membranes. (a) AL of the virgin FO membrane; (b) AL of the fouled FO membrane in the NaCl-reactor; (c) AL of the fouled FO membrane in the MgCl<sub>2</sub>-reactor; (d) SL of the virgin FO membrane; (e) SL of the fouled FO membrane in the NaCl-reactor; (f) SL of the fouled FO membrane in the MgCl<sub>2</sub>-reactor.**

**Fig. S5. CLSM images of total cells (SYTO 63), proteins (FITC),  $\alpha$ -D-glucopyranose polysaccharides (Con A) and  $\beta$ -D-glucopyranose polysaccharides (CW) in the FO biofouling active layer. (a) and (b) total cells in the NaCl-reactor and MgCl<sub>2</sub>-reactor, respectively; (c) and (d) proteins in the NaCl-reactor and MgCl<sub>2</sub>-reactor, respectively; (e) and (f)  $\alpha$ -D-glucopyranose polysaccharides in the NaCl-reactor and MgCl<sub>2</sub>-reactor, respectively; (g) and (h)  $\beta$ -D-glucopyranose polysaccharides in the NaCl-reactor and MgCl<sub>2</sub>-reactor, respectively.**

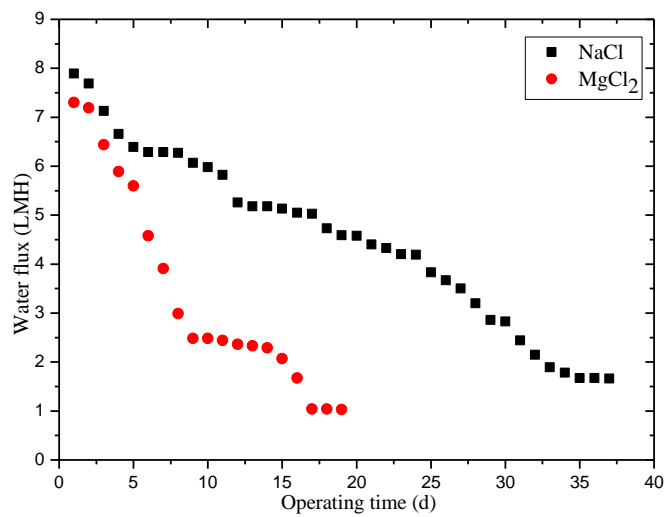

Fig. S1. Variations of water flux of MF membrane in both AnMF-OMBRs.

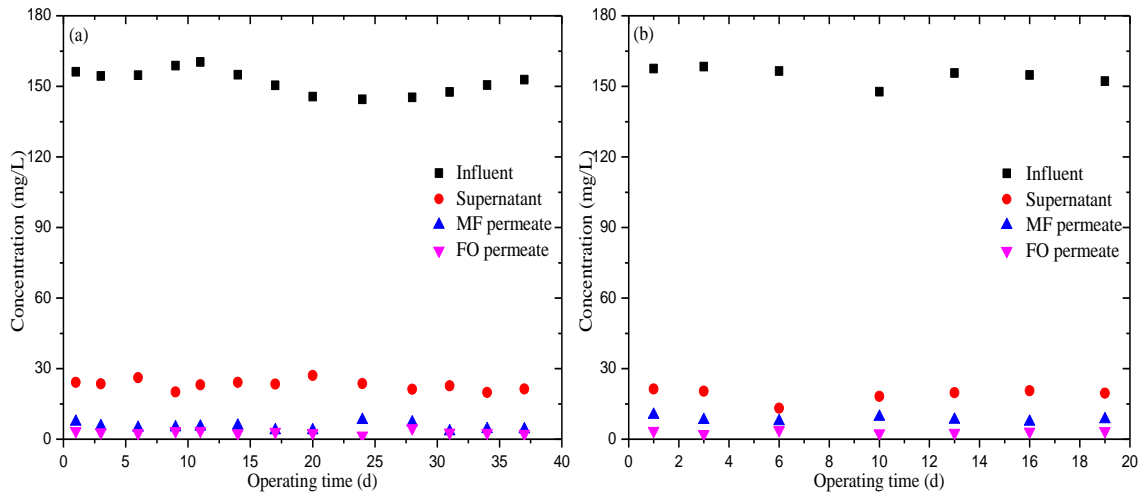

Fig. S2. Variations of TOC concentrations in the influent, sludge supernatant, MF and FO permeates in NaCl-reactor (a) and MgCl<sub>2</sub>-reactor (b).

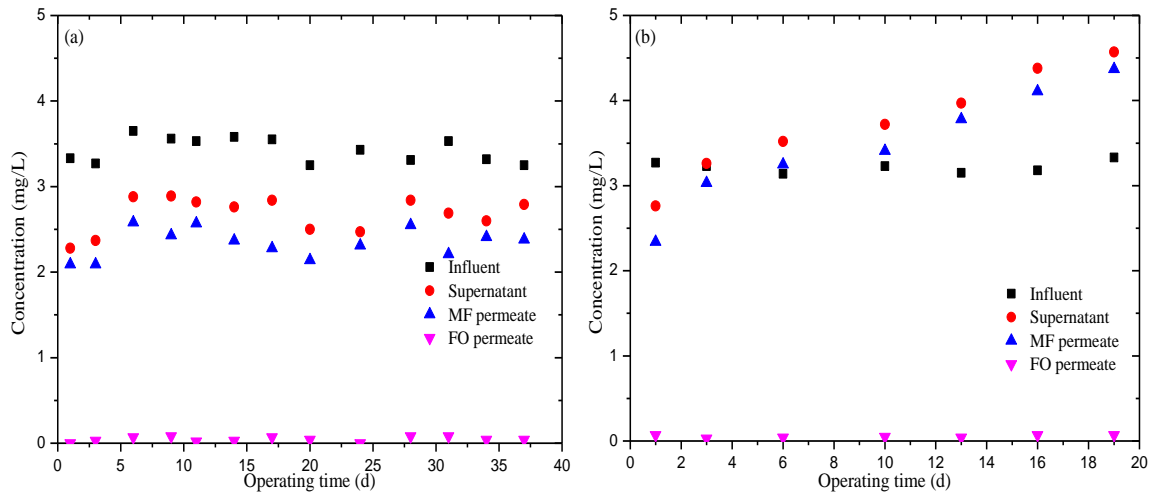

Fig. S3. Variations of TP concentrations in the influent, sludge supernatant, MF and FO permeates in NaCl-reactor (a) and MgCl<sub>2</sub>-reactor (b).

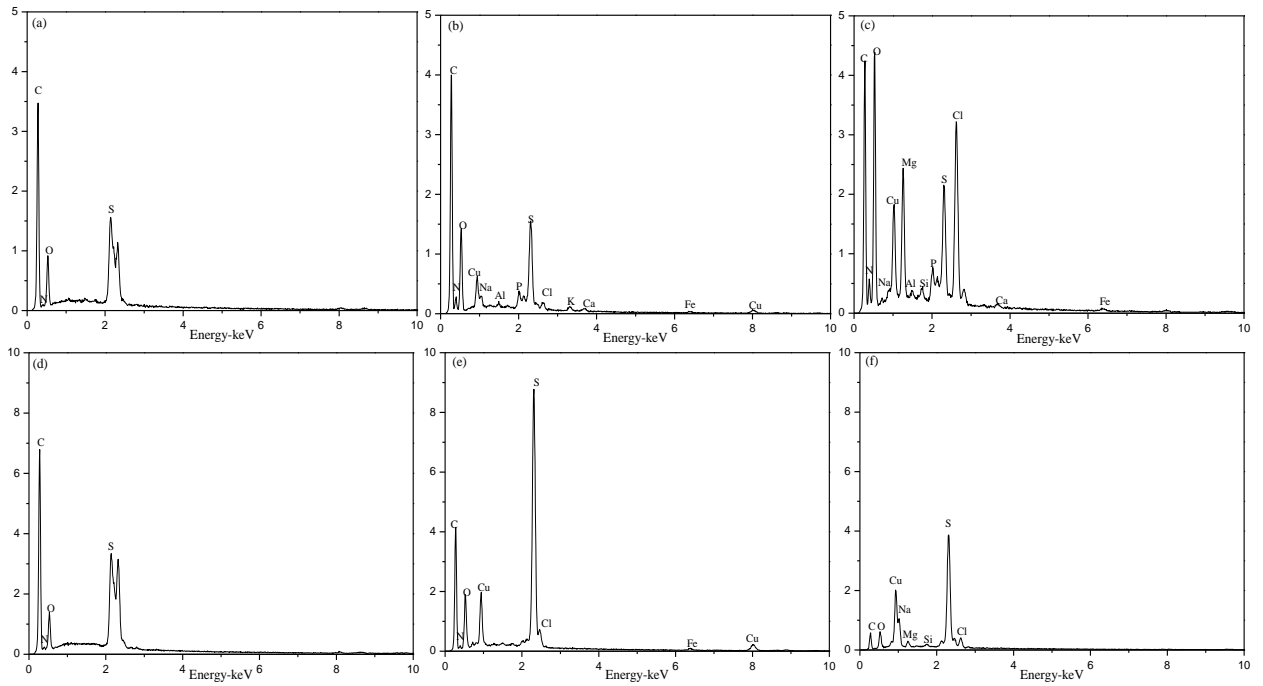

Fig. S4. EDX images of new and fouled FO membranes. (a) AL of the virgin FO membrane; (b) AL of the fouled FO membrane in the NaCl-reactor; (c) AL of the fouled FO membrane in the MgCl<sub>2</sub>-reactor; (d) SL of the virgin FO membrane; (e) SL of the fouled FO membrane in the NaCl-reactor; (f) SL of the fouled FO membrane in the MgCl<sub>2</sub>-reactor.

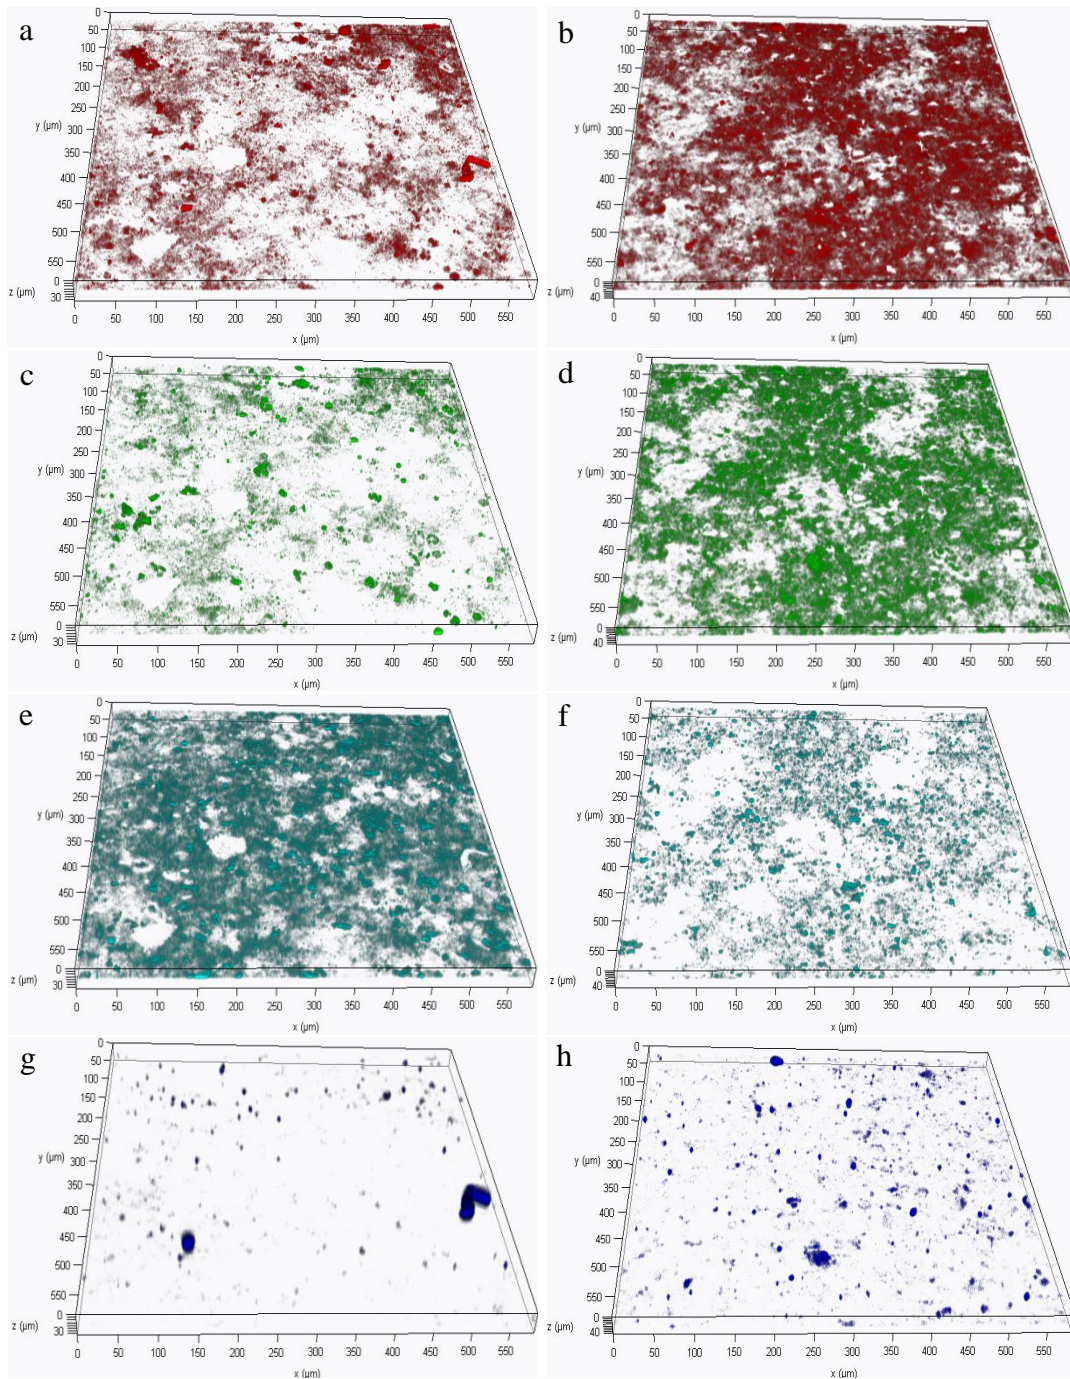

Fig. S5. CLSM images of total cells (SYTO 63), proteins (FITC),  $\alpha$ -D-glucopyranose polysaccharides (Con A) and  $\beta$ -D-glucopyranose polysaccharides (CW) in the FO biofouling of AL. (a) and (b) total cells in the NaCl-reactor and  $\text{MgCl}_2$ -reactor, respectively; (c) and (d) proteins in the NaCl-reactor and  $\text{MgCl}_2$ -reactor, respectively; (e) and (f)  $\alpha$ -D-glucopyranose polysaccharides in the NaCl-reactor and  $\text{MgCl}_2$ -reactor, respectively; (g) and (h)  $\beta$ -D-glucopyranose polysaccharides in the NaCl-reactor and  $\text{MgCl}_2$ -reactor, respectively.
